# Supplementary material for: Sugar and artificially sweetened beverages linked to obesity: a systematic review and meta-analysis
Source: Oxford University Press journal article supplement (doi:10.1093/qjmed/hcx068), 2017-03-18

**Online Supplementary Data 1**

**Item S1:** Search Strategy

Database: Embase (1988 to May 2015), MEDLINE (1946 to May 2015), Cochrane Database of Systematic Reviews (2005 to May 2015), Cochrane Central Register of Controlled Trials (2005 to May 2015)

1. exp soft drink/
2. soft drink$.mp.
3. exp soda/
4. soda$.mp.
5. sweetened beverage$.mp.
6. exp Carbonated Beverages/
7. Carbonated Beverages$.mp.
8. Sugary Soda$.mp.
9. Sugar Sweetened Soda$.mp
10. Artificially Sweetened Soda$.mp.
11. Or/1-10
12. exp obesity/
13. obesity$.mp.
14. exp body mass index/
15. body mass index$.mp.
16. BMI$.mp.
17. or/12-16
18. 11 And 17
19. limit 18 to "all adult (19 plus years)"
20. limit 19 to humans

**Item S2:** Outline of our search methodology.

Potentially relevant articles identified from search of MEDLINE, EMBASE, and Cochrane Database of Systematic Reviews and Cochrane Central Register of Controlled Trials (n=3478)

Title and abstract reviewed for screening

3219 articles were excluded based on title and abstract for clearly not fulfilling inclusion criteria on basis of type of article, study design, population or outcome of interest

259 potentially relevant articles included for full-length article review

- 133 articles were excluded because they were not observational studies or RCTs.

- 113 articles were excluded because they did not report the outcomes of interest

13 articles were included in the meta-analysis

(11 study samples for the association between obesity and sugar-sweetened soda)

(3 study samples for the association between obesity and artificially-sweetened soda)

**Figure S1:** Funnel plot of 11 studies included in the meta-analysis for the risk of obesity in patients who consumed sugar-sweetened soda. The graph is slight asymmetric and suggests the presence of publication in favor of positive studies. RR = risk ratio, SE = standard error.


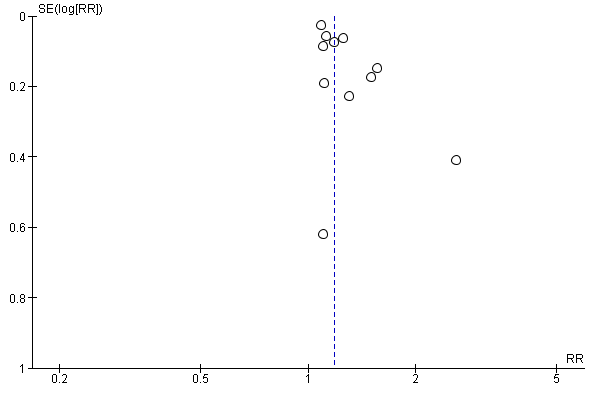


**Figure S2:** Funnel plot of 3 studies included in the meta-analysis for the risk of obesity in patients who consumed artificially-sweetened soda. The graph is slight asymmetric and suggests the presence of publication in favor of positive studies. RR = risk ratio, SE = standard error.


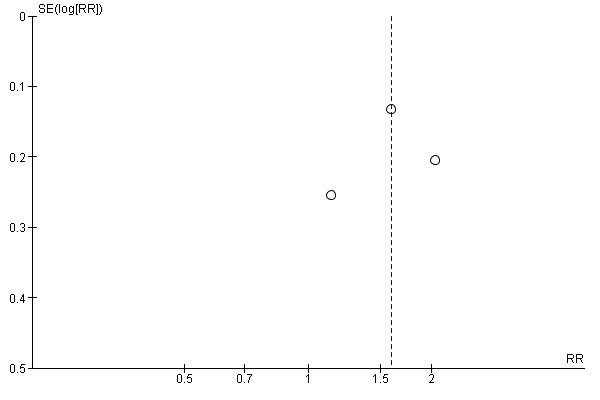

Supplement: Supplementary_data_1_hcx068.doc [file Supplementary_data_1_hcx068.doc]
